# Supplementary material for: Proteomic Analyses Reveal a Role of Cytoplasmic Droplets as an Energy Source during Epididymal Sperm Maturation
Source: PubMed Central journal article supplement (PMC3796460; doi:10.1371/journal.pone.0077466), 2013-10-14
Supplement: pone.0077466.s001.pdf [file pone.0077466.s001.pdf]

# **Proteomic analyses reveal a role of cytoplasmic droplets as an energy source during sperm epididymal maturation**

Shuiqiao Yuan<sup>a,b</sup>, Huili Zheng<sup>a</sup>, Zhihong Zheng<sup>b</sup>, Wei Yan<sup>a,1</sup>

<sup>a</sup>Department of Physiology and Cell Biology, University of Nevada School of Medicine, Reno, NV, 89557; and <sup>b</sup>Department of Laboratory Animal Medicine, China Medical University, Shenyang, 110001, China

<sup>1</sup> Corresponding author. Email: [wyan@unr.edu](mailto:wyan@unr.edu)

Supplemental Information contains one Figure (Figure S1), three Tables (Tables S1-S3) and two Videos (Videos S1 and S2) files.

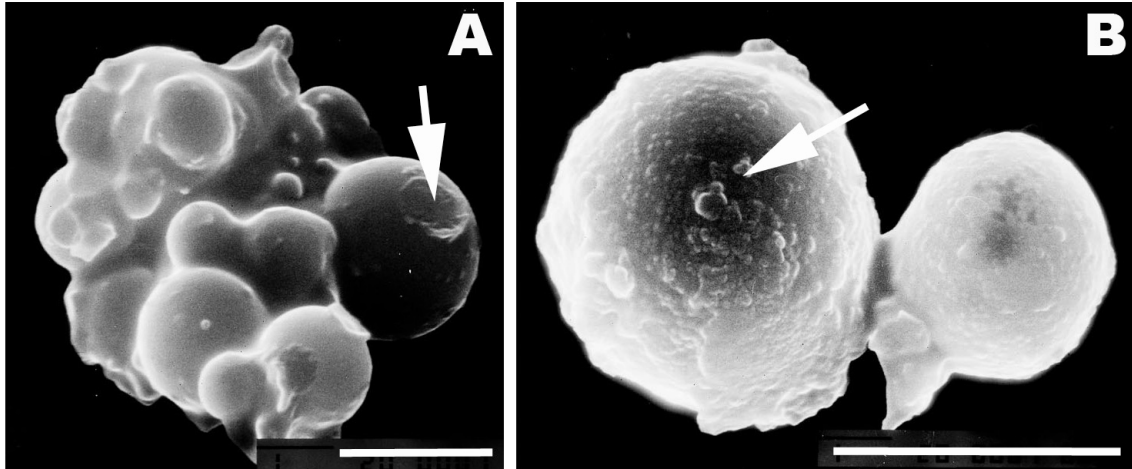

Figure S1. Scanning electron microscopic images of purified murine cytoplasmic droplets. Arrows point to indentations resembling the resealed defects at the detaching points when CDs come off the sperm flagella. Scale bar = 1 $\mu$ m

**Table S1 Mass spectrometry-based identification of proteins highly enriched in murine cytoplasmic droplets.**

| #  | MS/MS View/Identified Proteins (105)                                                                                                     | Accession Number | Molecular Weight | Protein Grouping | Ambiguity | Dot_1 | Dot_2 | Dot_3 | Dot_4 | Dot_5 | Dot_1_2 | Dot_2_2 | Dot_3_2 | Dot_4_2 | Dot_5_2 |
|----|------------------------------------------------------------------------------------------------------------------------------------------|------------------|------------------|------------------|-----------|-------|-------|-------|-------|-------|---------|---------|---------|---------|---------|
| 1  | IP1P00467457.3 Tax_Id=10090 Gene_Symbol=Ldch L-lactate dehydrogenase C chain                                                             | IP00467457       | 36 kDa           | TRUE             |           | 91%   | 100%  | 100%  | 100%  | 100%  |         | 100%    | 100%    | 100%    | 100%    |
| 2  | IP1P00273320.2 Tax_Id=10090 Gene_Symbol=Putative uncharacterized protein                                                                 | IP00047320       | 42 kDa           | TRUE             |           | 75%   | 100%  | 100%  | 100%  | 100%  | 89%     | 100%    | 100%    | 100%    | 100%    |
| 3  | IP1P00224181.7 Tax_Id=10090 Gene_Symbol=Akr1b7 Aldose reductase-related protein 1                                                        | IP00224181       | 36 kDa           | TRUE             |           |       |       |       | 100%  | 100%  |         |         |         | 100%    | 100%    |
| 4  | IP1P00228633.7 Tax_Id=10090 Gene_Symbol=Gp11 Glucose-6-phosphate isomerase                                                               | IP00228633       | 63 kDa           |                  |           |       | 100%  |       |       |       |         |         | 100%    | 100%    | 100%    |
| 5  | IP1P00134191.3 Tax_Id=10090 Gene_Symbol=Slc2a3 Solute carrier family 2, facilitated glucose transporter member 3                         | IP00134191       | 53 kDa           |                  |           | 100%  | 100%  | 100%  | 100%  | 100%  | 100%    | 100%    | 100%    | 100%    | 100%    |
| 6  | IP1P00272690.2 Tax_Id=10090 Gene_Symbol=Ace Isoform Somatic of Angiotensin-converting enzyme                                             | IP00272690       | 151 kDa          |                  |           | 100%  | 100%  | 100%  | 89%   | 100%  | 100%    | 100%    | 100%    | 100%    | 89%     |
| 7  | IP1P0029768.1 Tax_Id=10090 Gene_Symbol=Pgd Phosphoglycerate kinase 2                                                                     | IP0029768        | 45 kDa           |                  |           | 91%   | 100%  | 100%  | 100%  | 100%  | 100%    | 100%    | 100%    | 100%    | 100%    |
| 8  | IP1P00320217.9 Tax_Id=10090 Gene_Symbol=Cct2 T-complex protein 1 subunit beta                                                            | IP00320217       | 57 kDa           |                  |           |       | 100%  | 100%  | 89%   |       |         |         | 100%    | 100%    | 48%     |
| 9  | IP1P00387281.1 Tax_Id=10090 Gene_Symbol=Oxct2a Succinyl-CoA:3-ketoadic-coenzyme A transferase 2A, mitochondrial                          | IP00387281       | 56 kDa           | TRUE             |           |       | 100%  | 78%   |       |       |         |         | 100%    |         |         |
| 10 | IP1P00114593.1 Tax_Id=10090 Gene_Symbol=Actc1 Actin, alpha cardiac muscle 1                                                              | IP00114593 (+1)  | 42 kDa           |                  |           |       | 100%  | 100%  | 89%   | 90%   |         |         | 100%    | 89%     | 92%     |
| 11 | IP1P00138399.9 Tax_Id=10090 Gene_Symbol=Heatr7b2 hypothetical protein LOC223825                                                          | IP00138399       | 188 kDa          |                  |           | 100%  |       |       |       |       | 100%    |         |         |         |         |
| 12 | IP1P00460693.2 Tax_Id=10090 Gene_Symbol=Pcyox1 Prenylcysteine oxidase                                                                    | IP00460693       | 58 kDa           |                  |           |       | 100%  |       |       |       |         |         | 100%    |         |         |
| 13 | IP1P00387289.3 Tax_Id=10090 Gene_Symbol=Cc3 Carbonyltransferase 3                                                                        | IP00387289       | 62 kDa           |                  |           |       | 100%  |       |       |       |         |         | 100%    |         |         |
| 14 | IP1P00331394.3 Tax_Id=10090 Gene_Symbol=Onpep aspartyl aminopeptidase isoform a                                                          | IP00331394       | 52 kDa           |                  |           | 100%  | 100%  |       |       |       |         |         | 100%    |         |         |
| 15 | IP1P00125705.1 Tax_Id=10090 Gene_Symbol=Tex101 Testis-expressed protein 101                                                              | IP00125705       | 27 kDa           |                  |           |       |       |       | 100%  | 100%  |         |         |         | 100%    | 100%    |
| 16 | IP1P00319965.3 Tax_Id=10090 Gene_Symbol=Psmd6 26S proteasome non-ATPase regulatory subunit 6                                             | IP00319965       | 46 kDa           |                  |           |       |       | 100%  |       |       |         |         | 100%    |         |         |
| 17 | IP1P00122815.3 Tax_Id=10090 Gene_Symbol=P4hb Putative uncharacterized protein                                                            | IP00122815 (+1)  | 57 kDa           |                  |           | 100%  |       |       |       |       |         | 100%    | 100%    |         |         |
| 18 | IP1P00125971.1 Tax_Id=10090 Gene_Symbol=Psmc2 26S proteasome regulatory subunit S10B                                                     | IP00125971       | 44 kDa           |                  |           |       |       |       |       |       |         |         | 100%    | 100%    |         |
| 19 | IP1P002230108.6 Tax_Id=10090 Gene_Symbol=Pdl3 Protein disulfide-isomerase A3                                                             | IP002230108      | 57 kDa           |                  |           | 100%  |       |       |       |       |         |         | 100%    |         |         |
| 20 | IP1P00554868.2 Tax_Id=10090 Gene_Symbol=Prps1 Ribose-phosphate pyrophosphokinase 1                                                       | IP00554868 (+4)  | 35 kDa           | TRUE             |           |       |       |       | 100%  |       |         |         |         | 100%    |         |
| 21 | IP1P00228630.5 Tax_Id=10090 Gene_Symbol=Fbp1 Fructose-1,6-bisphosphatase 1                                                               | IP00228630       | 37 kDa           |                  |           |       |       |       | 100%  |       |         |         |         | 100%    |         |
| 22 | IP1P00762897.2 Tax_Id=10090 Gene_Symbol=Uggt1 UDP-glucose glycoprotein glucosyltransferase 1                                             | IP00762897       | 176 kDa          |                  |           | 100%  |       |       |       |       |         |         |         | 100%    |         |
| 23 | IP1P00314430.3 Tax_Id=10090 Gene_Symbol=Psm14 26S proteasome non-ATPase regulatory subunit 3                                             | IP00314430 (+1)  | 61 kDa           |                  |           |       |       | 100%  |       |       |         |         | 100%    |         |         |
| 24 | IP1P00119495.3 Tax_Id=10090 Gene_Symbol=Prss21 Testin                                                                                    | IP00119495       | 36 kDa           |                  |           |       |       | 100%  | 89%   | 100%  |         |         |         | 89%     | 92%     |
| 25 | IP1P00273646.9 Tax_Id=10090 Gene_Symbol=Gm3272.L0C10042025.Gm12033.Gapdh.Gm10359.Gm2574.Gm5138 Glycerlaldehyde-3-phosphate dehydrogenase | IP00273646       | 36 kDa           | TRUE             |           |       | 100%  |       | 100%  |       |         |         | 100%    | 100%    |         |
| 26 | IP1P00225945.1 Tax_Id=10090 Gene_Symbol=LdhlaB L-lactate dehydrogenase                                                                   | IP00225945       | 42 kDa           | TRUE             |           |       | 83%   | 100%  | 100%  |       |         |         |         | 90%     | 100%    |
| 27 | IP1P00626662.3 Tax_Id=10090 Gene_Symbol=Aldh1a1 Retinal dehydrogenase 1                                                                  | IP00626662       | 54 kDa           |                  |           |       | 100%  | 100%  | 100%  |       |         |         | 100%    | 100%    | 87%     |
| 28 | IP1P00124221.1 Tax_Id=10090 Gene_Symbol=Ct4 T-complex protein 1 subunit delta                                                            | IP00124221       | 32 kDa           |                  |           |       | 100%  | 100%  | 100%  | 90%   |         |         | 100%    | 100%    | 100%    |
| 29 | IP1P00115528.3 Tax_Id=10090 Gene_Symbol=Pfs1 Plastin-3                                                                                   | IP00115528 (+1)  | 71 kDa           | TRUE             |           |       | 100%  |       |       |       |         |         |         | 100%    | 100%    |
| 30 | IP1P00119113.3 Tax_Id=10090 Gene_Symbol=Atp6v1b2 V-type proton ATPase subunit B, brain isoform                                           | IP00119113       | 57 kDa           | TRUE             |           |       | 100%  |       |       |       |         |         | 100%    |         |         |
| 31 | IP1P00225961.5 Tax_Id=10090 Gene_Symbol=Pghd3 D-3-phosphoglycerate dehydrogenase                                                         | IP00225961       | 57 kDa           |                  |           |       | 100%  |       |       |       |         |         | 100%    |         |         |
| 32 | IP1P00468124.1 Tax_Id=10090 Gene_Symbol=Ppp3cc Serine/threonine-protein phosphatase 2B catalytic subunit gamma isoform                   | IP00468124       | 59 kDa           | TRUE             |           |       | 100%  |       |       |       |         |         | 100%    |         |         |
| 33 | IP1P00116277.3 Tax_Id=10090 Gene_Symbol=Ct4 T-complex protein 1 subunit delta                                                            | IP00116277       | 58 kDa           |                  |           |       | 100%  | 100%  |       |       | 91%     |         | 100%    | 100%    |         |
| 34 | IP1P00228867.5 Tax_Id=10090 Gene_Symbol=G6pd2 Glucose-6-phosphate 1-dehydrogenase 2                                                      | IP00228867       | 59 kDa           | TRUE             |           |       |       |       |       |       |         |         | 100%    | 100%    |         |
| 35 | IP1P00225668.1 Tax_Id=10090 Gene_Symbol=Fam78a Protein FAM78A                                                                            | IP00225668       | 32 kDa           |                  |           |       |       |       | 100%  |       |         |         |         |         |         |
| 36 | IP1P00114256.2 Tax_Id=10090 Gene_Symbol=Sypl Isoform 1 of Synaptophysin-like protein 1                                                   | IP00114256 (+1)  | 29 kDa           |                  |           | 83%   |       |       | 100%  |       |         |         | 100%    | 100%    |         |
| 37 | IP1P00118037.1 Tax_Id=10090 Gene_Symbol=Dppe3 Dipeptidase 3                                                                              | IP00118037       | 54 kDa           |                  |           | 100%  |       | 100%  | 100%  | 100%  |         |         | 100%    | 100%    | 100%    |
| 38 | IP1P00113262.1 Tax_Id=10090 Gene_Symbol=Psm14 26S proteasome non-ATPase regulatory subunit 14                                            | IP00113262       | 35 kDa           |                  |           |       |       |       | 100%  |       |         |         |         | 100%    |         |
| 39 | IP1P00221540.1 Tax_Id=10090 Gene_Symbol=Erln2 Erim-2                                                                                     | IP00221540       | 38 kDa           |                  |           |       |       | 100%  |       |       |         |         | 100%    |         |         |
| 40 | IP1P00469307.2 Tax_Id=10090 Gene_Symbol=Lrap1 Alpha-2-macroglobulin receptor-associated protein                                          | IP00469307       | 42 kDa           |                  |           |       |       | 100%  |       |       |         |         | 100%    |         |         |
| 41 | IP1P00261627.1 Tax_Id=10090 Gene_Symbol=Sucla2 Succinyl-CoA ligase [ADP-forming] subunit beta, mitochondrial                             | IP00261627       | 50 kDa           |                  |           |       | 100%  |       | 90%   |       |         |         | 100%    |         |         |
| 42 | IP1P00268308.5 Tax_Id=10090 Gene_Symbol=Prss46 1700112C13Rik protein                                                                     | IP00268308       | 34 kDa           |                  |           |       | 89%   | 100%  | 100%  |       |         |         |         | 100%    | 92%     |
| 43 | IP1P00131204.1 Tax_Id=10090 Gene_Symbol=Ug2 Isoform 1 of UDP-glucose-1-phosphate uridylyltransferase                                     | IP00131204 (+1)  | 57 kDa           |                  |           | 100%  |       |       |       |       |         |         | 100%    |         |         |
| 44 | IP1P0030874850.1 Tax_Id=10090 Gene_Symbol=Car4 Carbonic anhydrase 4                                                                      | IP0030874850     | 34 kDa           |                  |           |       |       |       | 100%  | 100%  | 100%    |         |         | 100%    | 100%    |
| 45 | IP1P00130280.1 Tax_Id=10090 Gene_Symbol=Atp5a1 ATP synthase subunit alpha, mitochondrial                                                 | IP00130280       | 60 kDa           |                  |           | 100%  |       |       |       |       |         |         | 100%    |         |         |
| 46 | IP1P00379245.2 Tax_Id=10090 Gene_Symbol=Gnpd1 Glucosamine-6-phosphate isomerase 1                                                        | IP00379245 (+1)  | 33 kDa           |                  |           |       |       |       | 100%  | 100%  |         |         |         | 100%    | 92%     |
| 47 | IP1P00117705.1 Tax_Id=10090 Gene_Symbol=Odost Dolichyl-diphosphooligosaccharide-protein glycosyltransferase 48 kDa subunit               | IP00117705 (+1)  | 49 kDa           |                  |           |       | 100%  |       |       |       |         |         | 100%    |         |         |
| 48 | IP1P00112876.2 Tax_Id=10090 Gene_Symbol=Prss52 Testicular-specific serine protease 3                                                     | IP00112876 (+1)  | 36 kDa           |                  |           |       | 100%  | 100%  | 90%   |       |         |         | 100%    | 100%    | 100%    |
| 49 | IP1P00118930.1 Tax_Id=10090 Gene_Symbol=Napa Alpha-soluble NSF attachment protein                                                        | IP00118930       | 33 kDa           |                  |           |       | 100%  |       |       | 100%  |         |         |         | 100%    | 100%    |
| 50 | IP1P00330862.5 Tax_Id=10090 Gene_Symbol=LOC100041777.Er Ern                                                                              | IP00330862       | 59 kDa           |                  |           |       |       |       |       |       |         |         | 100%    |         |         |
| 51 | IP1P00116331.1 Tax_Id=10090 Gene_Symbol=Sgt4 Isoform 1 of Small glutamine-rich tetrapeptide repeat-containing protein alpha              | IP00116331 (+1)  | 34 kDa           |                  |           |       |       | 100%  |       |       |         |         |         | 100%    |         |
| 52 | IP1P00307837.6 Tax_Id=10090 Gene_Symbol=Eef1a1 Elongation factor 1-alpha 1                                                               | IP00307837       | 50 kDa           |                  |           |       | 100%  | 100%  | 90%   |       |         |         | 100%    | 100%    | 92%     |
| 53 | IP1P00221402.7 Tax_Id=10090 Gene_Symbol=Aldoa Fructose-bisphosphate aldolase A                                                           | IP00221402 (+1)  | 39 kDa           | TRUE             |           |       |       | 100%  | 90%   |       |         |         | 100%    | 100%    |         |
| 54 | IP1P00313475.1 Tax_Id=10090 Gene_Symbol=Atp5c1 ATP synthase subunit gamma, mitochondrial                                                 | IP00313475 (+2)  | 33 kDa           |                  |           |       |       |       |       |       |         | 100%    |         |         | 100%    |
| 55 | IP1P00118279.1 Tax_Id=10090 Gene_Symbol=Slc16a7 Monocarboxylate transporter 2                                                            | IP00118279       | 53 kDa           |                  |           | 100%  | 99%   | 100%  | 100%  | 100%  | 91%     | 76%     | 90%     | 100%    | 100%    |
| 56 | IP1P00355382.2 Tax_Id=10090 Gene_Symbol=Wars Isoform 2 of Tryptophanyl-tRNA synthetase, cytoplasmic                                      | IP00355382       | 54 kDa           |                  |           |       | 100%  | 89%   | 100%  |       |         |         | 100%    | 90%     | 100%    |
| 57 | IP1P00116281.3 Tax_Id=10090 Gene_Symbol=Ct6a T-complex protein 1 subunit zeta                                                            | IP00116281       | 58 kDa           |                  |           |       |       |       | 100%  |       |         |         | 100%    | 100%    |         |
| 58 | IP1P00122522.1 Tax_Id=10090 Gene_Symbol=Gt1 Gamma-glutamyltranspeptidase 1                                                               | IP00122522 (+1)  | 62 kDa           |                  |           |       | 100%  |       |       |       |         |         | 100%    |         |         |
| 59 | IP1P00127841.3 Tax_Id=10090 Gene_Symbol=Slc25a5 ADP/ATP translocase 2                                                                    | IP00127841       | 33 kDa           | TRUE             |           |       |       |       | 89%   | 100%  |         |         |         |         | 100%    |
| 60 | IP1P0012743.1 Tax_Id=10090 Gene_Symbol=Dars Aspartyl-tRNA synthetase, cytoplasmic                                                        | IP0012743 (+1)   | 57 kDa           |                  |           |       | 100%  |       |       |       |         |         | 100%    |         |         |
| 61 | IP1P00118594.1 Tax_Id=10090 Gene_Symbol=Pfh2a2 Pyruvate dehydrogenase E1 component subunit alpha, testis-specific form, mitochondrial    | IP00118594       | 43 kDa           |                  |           |       |       | 100%  |       |       |         |         | 100%    |         |         |
| 62 | IP1P00329890.1 Tax_Id=10090 Gene_Symbol=BCD49730 cDNA sequence BCD49730                                                                  | IP00329890       | 27 kDa           |                  |           |       |       |       | 100%  | 100%  |         |         |         | 100%    | 100%    |
| 63 | IP1P00116222.1 Tax_Id=10090 Gene_Symbol=Hibadh 3-hydroxyisobutyrate dehydrogenase, mitochondrial                                         | IP00116222       | 35 kDa           |                  |           |       |       |       | 100%  | 100%  |         |         |         | 100%    | 100%    |
| 64 | IP1P00330480.1 Tax_Id=10090 Gene_Symbol= - 35 kDa protein                                                                                | IP00330480       | 35 kDa           | TRUE             |           | 100%  | 83%   | 99%   | 89%   |       |         |         |         | 89%     | 99%     |
| 65 | IP1P00223757.4 Tax_Id=10090 Gene_Symbol=Akr1b3 Aldose reductase                                                                          | IP00223757       | 36 kDa           | TRUE             |           |       |       |       |       |       |         |         |         | 100%    |         |
| 66 | IP1P00127119.1 Tax_Id=10090 Gene_Symbol=Adad Delta-aminolevulinic acid dehydratase                                                       | IP00127119       | 36 kDa           |                  |           |       |       |       |       |       |         |         |         | 100%    |         |
| 67 | IP1P00753038.1 Tax_Id=10090 Gene_Symbol=Sord Sorbitol dehydrogenase                                                                      | IP00753038 (+1)  | 38 kDa           |                  |           |       | 83%   | 100%  | 100%  |       |         |         | 100%    | 100%    |         |
| 68 | IP1P00114209.1 Tax_Id=10090 Gene_Symbol=Glul1 Glutamate dehydrogenase 1, mitochondrial                                                   | IP00114209       | 61 kDa           |                  |           |       | 100%  |       |       |       |         |         | 100%    | 100%    |         |
| 69 | IP1P00132475.2 Tax_Id=10090 Gene_Symbol=Lman1 Putative uncharacterized protein                                                           | IP00132475       | 61 kDa           |                  |           |       | 100%  |       |       |       |         |         | 100%    |         |         |
| 70 | IP1P00122344.1 Tax_Id=10090 Gene_Symbol=Cth Cystathionine gamma-lyase                                                                    | IP00122344       | 44 kDa           |                  |           |       |       |       | 100%  |       |         |         | 100%    |         |         |
| 71 | IP1P00469268.5 Tax_Id=10090 Gene_Symbol=Ct8 T-complex protein 1 subunit theta                                                            | IP00469268       | 60 kDa           |                  |           |       |       |       | 100%  |       |         |         | 100%    |         |         |
| 72 | IP1P00114801.2 Tax_Id=10090 Gene_Symbol=Inpp1 Inositol polyphosphate 1-phosphatase                                                       | IP00114801       | 43 kDa           |                  |           |       |       | 100%  |       |       |         |         | 100%    |         |         |
| 73 | IP1P00131887.3 Tax_Id=10090 Gene_Symbol=Ptgr1 Prostaglandin reductase 1                                                                  | IP00131887       | 36 kDa           |                  |           |       |       |       | 100%  |       |         |         | 100%    | 73%     |         |
| 74 | IP1P00114402.2 Tax_Id=10090 Gene_Symbol=Spam1 Hyaluronidase PH-20                                                                        | IP00114402       | 58 kDa           |                  |           |       |       | 100%  | 100%  |       |         |         | 100%    | 90%     | 100%    |
| 75 | IP1P00134521.1 Tax_Id=10090 Gene_Symbol=Gapdh3 Glycerlaldehyde-3-phosphate dehydrogenase, testis-specific                                | IP00134521       | 48 kDa           | TRUE             |           |       | 100%  |       |       |       |         |         | 100%    |         |         |
| 76 | IP1P00113669.1 Tax_Id=10090 Gene_Symbol=Big Isoform 2 of Basigin                                                                         | IP00113669       |                  |                  |           |       |       |       |       |       |         |         |         |         |         |

|     |                  |              |                      |                                                                         |                 |         |      |      |      |      |
|-----|------------------|--------------|----------------------|-------------------------------------------------------------------------|-----------------|---------|------|------|------|------|
| 99  | IPI:IP00338561.4 | Tax_id=10090 | Gene_Symbol=Sil1     | Nucleotide exchange factor Sil1                                         | IP00338561      | 52 kDa  | 100% |      | 100% |      |
| 100 | IPI:IP00110224.1 | Tax_id=10090 | Gene_Symbol=Hsd17b11 | Isoform 1 of Estradiol 17-beta-dehydrogenase 11                         | IP00110224 (+1) | 33 kDa  |      | 100% |      | 100% |
| 101 | IPI:IP00230139.5 | Tax_id=10090 | Gene_Symbol=FKBP4    | FK506-binding protein 4                                                 | IP00230139      | 52 kDa  | 100% |      | 100% |      |
| 102 | IPI:IP00411056.1 | Tax_id=10090 | Gene_Symbol=Atg8b3   | SAPLT                                                                   | IP00411056 (+1) | 152 kDa | 100% |      | 91%  |      |
| 103 | IPI:IP00283264.2 | Tax_id=10090 | Gene_Symbol=Arad5    | Arrestin domain-containing protein 5                                    | IP00283264      | 37 kDa  |      | 89%  |      | 100% |
| 104 | IPI:IP00129319.3 | Tax_id=10090 | Gene_Symbol=Ppp1r7   | Protein phosphatase 1 regulatory subunit 7                              | IP00129319      | 41 kDa  |      | 100% |      | 100% |
| 105 | IPI:IP00475154.1 | Tax_id=10090 | Gene_Symbol=Rpn2     | Dolichyl-diphosphooligosaccharide-protein glycosyltransferase subunit 2 | IP00475154 (+2) | 69 kDa  | 100% |      | 76%  |      |

**Table S2. Proteins with known or potential enzymatic activities enriched in murine cytoplasmic droplets**

| Gene symbol                                                      | Enzymatic activity                                                                                             | Function in sperm and in male reproduction                                                                                     | Known inhibitors                                                                                                                                                                         |
|------------------------------------------------------------------|----------------------------------------------------------------------------------------------------------------|--------------------------------------------------------------------------------------------------------------------------------|------------------------------------------------------------------------------------------------------------------------------------------------------------------------------------------|
| Acat1                                                            | metal ion binding                                                                                              | NA                                                                                                                             | None                                                                                                                                                                                     |
| Ace                                                              | regulation of blood pressure;dipeptidyl-carboxypeptidase activity                                              | Male fertilization; zona pellucida binding                                                                                     | Ramipril;Captopril; lisinopril;Fosinopril; Enalapril; Quinapril; Cilazapril                                                                                                              |
| Akr1b3                                                           | alditol:NADP+ 1-oxidoreductase activity; glyceraldehyde oxidoreductase activity                                | NA                                                                                                                             | GP-1447 (3-[(4,5,7-trifluorobenzothiazol-2-yl)methyl]-5-methylphenyl acetic acid); WJ-38; $\beta$ -glucogallin                                                                           |
| Akr1b7                                                           | detoxifying processes; aldehyde reductase activity                                                             | No phenotype for male                                                                                                          | None                                                                                                                                                                                     |
| Alad                                                             | porphobilinogen synthase activity; identical protein binding                                                   | biochemical parameters of semen quality                                                                                        | None                                                                                                                                                                                     |
| Aldh1a1                                                          | retinal dehydrogenase activity; 3-chloroallyl aldehyde dehydrogenase activity                                  | NA                                                                                                                             | None                                                                                                                                                                                     |
| Aldh1a2                                                          | 3-chloroallyl aldehyde dehydrogenase activity                                                                  | a promising target for the development of a reversible, nonhormonal male contraceptive; testicular retinoic acid biosynthesis  | bisdichloroacetyldiamine WIN 18,446                                                                                                                                                      |
| Aldoa                                                            | glycolysis for fructose-bisphosphate aldolase activity                                                         | support sperm motility                                                                                                         | None                                                                                                                                                                                     |
| Amdhd2                                                           | N-acetylglucosamine-6-phosphate deacetylase activity;hydrolase activity                                        | NA                                                                                                                             | None                                                                                                                                                                                     |
| Atp1b3                                                           | sodium:potassium-exchanging ATPase activity                                                                    | NA                                                                                                                             | None                                                                                                                                                                                     |
| Atp5a1                                                           | ATP binding                                                                                                    | NA                                                                                                                             | None                                                                                                                                                                                     |
| Atp5c1                                                           | hydrogen ion transporting ATPase activity, rotational mechanism                                                | NA                                                                                                                             | None                                                                                                                                                                                     |
| Atp6v1b1                                                         | hydrogen ion transmembrane transporter activity                                                                | major contributor to luminal acidification                                                                                     | Bafilomycin A1                                                                                                                                                                           |
| Atp6v1b2                                                         | hydrogen ion transporting ATPase activity, rotational mechanism                                                | establish an acidic luminal pH in epididymis and vas deferens                                                                  | None                                                                                                                                                                                     |
| Atp8b3                                                           | ATP binding                                                                                                    | Acrosome development and/or in sperm function during fertilization                                                             | None                                                                                                                                                                                     |
| Car4                                                             | carbonate dehydratase activity; lyase activity; zinc ion binding                                               | acidification of the epididymal fluid that prevents premature sperm activation and regulation of sperm maturation and motility | acetazolamide (AZ); 2-(4-sulfamoylphenyl-amino)-4,6-dichloro-1,3,5-triazine (TR1); 4-[3-(N,N-dimethylaminopropyl)thioereidophenylsulfonylaminoethyl]benzenesulfonamide (GA15); Sulthiame |
| Ces3                                                             | carboxylesterase activity, fatty-acyl-ethyl-ester synthase activity                                            | NA                                                                                                                             | None                                                                                                                                                                                     |
| Cpne3                                                            | protein serine/threonine kinase activity                                                                       | NA                                                                                                                             | None                                                                                                                                                                                     |
| Cth                                                              | pyridoxal phosphate binding;calmodulin binding                                                                 | NA                                                                                                                             | DL-propargyl glycine;DL-propargylglycine                                                                                                                                                 |
| Dars                                                             | aspartate-tRNA ligase activity                                                                                 | NA                                                                                                                             | chloramphenicol analogs                                                                                                                                                                  |
| Ddost                                                            | dolichyl-diphosphooligosaccharide-protein glycotransferase activity                                            | NA                                                                                                                             | None                                                                                                                                                                                     |
| Dnpep                                                            | aminopeptidase activity; zinc ion binding; proteolysis                                                         | NA                                                                                                                             | None                                                                                                                                                                                     |
| Dpep3                                                            | metal ion binding;proteolysis                                                                                  | interactions with the Ts4 antigens, including TEX101, in testis                                                                | None                                                                                                                                                                                     |
| Eef1a1                                                           | GTP binding                                                                                                    | Localization in the midpiece of the sperm tail, involve in PASKIN-dependent phosphorylation                                    | Gamendazole                                                                                                                                                                              |
| Fbp1                                                             | metal ion binding; AMP binding; catalytic activity                                                             | Key substrate cycle enzyme and control of glycolysis in spermatid                                                              | adenosine monophosphate (AMP); MB07803                                                                                                                                                   |
| Fkbp4                                                            | peptidyl-prolyl cis-trans isomerase activity; copper-dependent protein binding; GTP binding                    | fertilizing capacity and sperm morphology;                                                                                     | None                                                                                                                                                                                     |
| G6pd2                                                            | glucose-6-phosphate dehydrogenase activity; NADP binding                                                       | probably related to X chromosome inactivation during spermatogenesis;                                                          | beta-naphthoquinone-4-sulfonic acid; Cu <sup>2+</sup> ;Dehydroepiandrosterone (DHEA)                                                                                                     |
| G6pdx                                                            | protein homodimerization activity;carbohydrate binding                                                         | NA                                                                                                                             | None                                                                                                                                                                                     |
| Gapdhs                                                           | glyceraldehyde-3-phosphate dehydrogenase (NAD <sup>+</sup> ) (phosphorylating) activity, NAD binding           | sperm motility and male fertility                                                                                              | Koningic acid (heptelidic acid); alpha-Chlorohydrin;ornidazole                                                                                                                           |
| Ggt1                                                             | gamma-glutamyltransferase activity;                                                                            | sperm GGT may be a limiting factor for male pronuclear formation in polyspermic oocytes                                        | serine/borate; OU749; acivicin                                                                                                                                                           |
| Glud1                                                            | glutamate dehydrogenase [NAD(P) <sup>+</sup> ] activity; positive regulation of insulin secretion; ADP binding | NA                                                                                                                             | glutamate dehydrogenases                                                                                                                                                                 |
| Glul                                                             | ATP binding                                                                                                    | maintaining an optimal microenvironment for sperm maturation                                                                   | methionine sulfoximine                                                                                                                                                                   |
| Gm3272;LOC100042025; Gm12033;Gapdh;Gm10293;Gm10359;Gm2574;Gm5138 | glyceraldehyde-3-phosphate dehydrogenase (phosphorylating) activity                                            | sperm motility                                                                                                                 | ornidazole; alpha-chlorohydrin; 1-chloro-3-hydroxypropanone.                                                                                                                             |
| Gnpda1                                                           | glucosamine-6-phosphate deaminase activity                                                                     | NA                                                                                                                             | None                                                                                                                                                                                     |
| Gpi1                                                             | glucose-6-phosphate isomerase activity                                                                         | involved in sperm agglutination                                                                                                | None                                                                                                                                                                                     |
| Hibadh                                                           | NAD binding; pentose-phosphate shunt                                                                           | NA                                                                                                                             | None                                                                                                                                                                                     |
| Hsd17b11                                                         | steroid biosynthetic process; estradiol 17-beta-dehydrogenase activity; nucleotide binding                     | NA                                                                                                                             | None                                                                                                                                                                                     |
| Inpp1                                                            | metal ion binding; inositol-1,4-bisphosphate 1-phosphatase activity                                            | NA                                                                                                                             | None                                                                                                                                                                                     |

|         |                                                                                                           |                                                                                                                                                                              |                                                                                                                               |
|---------|-----------------------------------------------------------------------------------------------------------|------------------------------------------------------------------------------------------------------------------------------------------------------------------------------|-------------------------------------------------------------------------------------------------------------------------------|
| Lap3    | metal ion binding;aminopeptidase activity; proteolysis                                                    | NA                                                                                                                                                                           | Bestatin                                                                                                                      |
| Ldhal6b | L-lactate dehydrogenase activity, oxidoreductase activity                                                 | NA                                                                                                                                                                           | None                                                                                                                          |
| Ldhc    | L-lactate dehydrogenase activity; oxidation reduction                                                     | required for male fertility and sperm function                                                                                                                               | sodium oxamate                                                                                                                |
| Oxct2a  | 3-oxoacid CoA-transferase activity; ketone body catabolic process                                         | testicular haploid germ cell-specific gene                                                                                                                                   | None                                                                                                                          |
| P4hb    | electron carrier activity, isomerase activity                                                             | esponsible for spermatogenesis                                                                                                                                               | testosterone undecanoate; levonorgestrel                                                                                      |
| Pcyox1  | prenylcysteine catabolic process; oxidoreductase activity,                                                | NA                                                                                                                                                                           | None                                                                                                                          |
| Pdha2   | pyruvate dehydrogenase (acetyl-transferring) activity; oxidoreductase activity                            | tyrosine phosphorylated in capacitated spermatozoa and required for sperm hyperactivation and acrosome reaction                                                              | bromopyruvate (BP)                                                                                                            |
| Pdia3   | protein disulfide isomerase activity; electron carrier activity                                           | play a critical role in gamete fusion;                                                                                                                                       | None                                                                                                                          |
| Pgk2    | ATP binding; kinase activity                                                                              | associated with male fertility and sperm function                                                                                                                            | 2-oxo-1,5-bisphosphonopentane                                                                                                 |
| Phgdh   | NAD binding                                                                                               | NA                                                                                                                                                                           | Koningic acid; l-Serine                                                                                                       |
| Ppp1cc  | protein serine/threonine phosphatase activity; protein amino acid dephosphorylation; metal ion binding    | required for spermiogenesis                                                                                                                                                  | Phosphatidic acid (PA)                                                                                                        |
| Ppp3cc  | phosphoprotein phosphatase activity; calmodulin binding                                                   | regulation of flagellar motility                                                                                                                                             | None                                                                                                                          |
| Prps1   | protein homodimerization activity; ribose phosphate diphosphokinase activity; ADP binding                 | NA                                                                                                                                                                           | aminopyrimidopyrimidine nucleotide 4-amino-8-(beta-D-ribofuranosylamino)pyrimido[5,4-d]pyrimidine[-5' -monophosphate (APP-MP) |
| Prps11l | kinase activity; metal ion binding                                                                        | NA                                                                                                                                                                           | None                                                                                                                          |
| Prps2   | protein homodimerization activity;ribose phosphate diphosphokinase activity; ADP binding                  | NA                                                                                                                                                                           | aminopyrimidopyrimidine nucleotide 4-amino-8-(beta-D-ribofuranosylamino)pyrimido[5,4-d]pyrimidine[-5' -monophosphate (APP-MP) |
| Prss21  | serine-type endopeptidase activity; catalytic activity                                                    | regulation of epididymal sperm cell maturation and sperm-fertilizing ability                                                                                                 | None                                                                                                                          |
| Prss46  | molecular function unknown                                                                                | NA                                                                                                                                                                           | None                                                                                                                          |
| Prss52  | serine-type endopeptidase activity; proteolysis                                                           | NA                                                                                                                                                                           | None                                                                                                                          |
| Psmc6   | ATP binding; nucleoside-triphosphatase activity; protein catabolic process                                | have a role in the remodeling of the outer dense fibers and other tail components during epididymal transit; degrade an ubiquitinated ZP (glyco)protein during fertilization | MG132                                                                                                                         |
| Psmd14  | metal ion binding; ubiquitin thiolesterase activity                                                       | NA                                                                                                                                                                           | None                                                                                                                          |
| Psmd3   | regulation of protein catabolic process;enzyme regulator activity                                         | NA                                                                                                                                                                           | None                                                                                                                          |
| Psmd6   | unknown                                                                                                   | NA                                                                                                                                                                           | None                                                                                                                          |
| Ptgr1   | 2-alkenal reductase activity;13-prostaglandin reductase activity; 15-oxoprostaglandin 13-oxidase activity | NA                                                                                                                                                                           | None                                                                                                                          |
| Rpn2    | dolichyl-diphosphooligosaccharide-protein glycotransferase activity; ribosome binding                     | NA                                                                                                                                                                           | None                                                                                                                          |
| Sgta    | protein heterodimerization activity; protein homodimerization activity; binding                           | NA                                                                                                                                                                           | None                                                                                                                          |
| Slc25a5 | transporter activity; binding                                                                             | NA                                                                                                                                                                           | None                                                                                                                          |
| Sord    | L-iditol 2-dehydrogenase activity; identical protein binding                                              | sperm motility and protein tyrosine phosphorylation                                                                                                                          | CP-642,931; SDI-711                                                                                                           |
| Spam1   | hyaluronoglucosaminidase activity; catalytic activity                                                     | function in sperm entry into the cumulus and sperm penetration through the cumulus matrix during fertilization                                                               | polyphenols (tannic acid, apigenin and quercetin) ; sodium cromoglycate and sodium auro-thiomalate                            |
| Sucla2  | ATP binding; succinate-CoA ligase (ADP-forming) activity;                                                 | NA                                                                                                                                                                           | None                                                                                                                          |
| Ugg1    | UDP-glucose:glycoprotein glucosyltransferase activity; protein amino acid glycosylation                   | NA                                                                                                                                                                           | None                                                                                                                          |
| Ugp2    | metal ion binding; UTP:glucose-1-phosphate uridylyltransferase activity                                   | NA                                                                                                                                                                           | None                                                                                                                          |
| Vdac3   | porin activity; nucleotide binding                                                                        | Function in sperm motility and epididymal axonemes structure                                                                                                                 | None                                                                                                                          |
| Wars    | ATP binding; tryptophan-tRNA ligase activity                                                              | NA                                                                                                                                                                           | None                                                                                                                          |

**Table S3. Species with epididymal sperm bearing cytoplasmic droplets.**

| <b>Species</b>        | <b>Literatures</b> |
|-----------------------|--------------------|
| Human                 | (1-4)              |
| Monkey                | (5, 6)             |
| Marmoset              | (7)                |
| Stallion              | (8)                |
| Donkey                | (9)                |
| Boar                  | (10-14)            |
| Bovine                | (15, 16)           |
| Goat                  | (17)               |
| Ram                   | (18, 19)           |
| Llamas                | (20)               |
| Cheetah               | (21)               |
| Tiger                 | (21)               |
| Leopard               | (21)               |
| Puma                  | (21)               |
| Cat                   | (22)               |
| Wolf                  | (23)               |
| Dog                   | (24-28)            |
| African elephant      | (29, 30)           |
| Rabbit                | (19, 31, 32)       |
| Guinea pig            | (33-35)            |
| Hamster               | (19, 36, 37)       |
| Rat                   | (19, 38-40)        |
| Mouse                 | (18)               |
| Bat                   | (41)               |
| Macropus              | (42)               |
| Trichosurus vulpecula | (43, 44)           |
| Bandicoot             | (45)               |
| Echidna               | (46)               |
| Platypus              | (47)               |
| Ostrich               | (48)               |
| Hagfish               | (49)               |

### References cited in Table S3:

1. Fetic S, Yeung CH, Sonntag B, Nieschlag E, & Cooper TG (2006) Relationship of cytoplasmic droplets to motility, migration in mucus, and volume regulation of human spermatozoa. (Translated from eng) *J Androl* 27(2):294-301 (in eng).
2. Weng SL, *et al.* (2002) Caspase activity and apoptotic markers in ejaculated human sperm. (Translated from eng) *Mol Hum Reprod* 8(11):984-991 (in eng).
3. Naaby-Hansen S, *et al.* (2001) Co-localization of the inositol 1,4,5-trisphosphate receptor and calreticulin in the equatorial segment and in membrane bounded vesicles in the cytoplasmic droplet of human spermatozoa. (Translated from eng) *Mol Hum Reprod* 7(10):923-933 (in eng).
4. Panidis D, Rouso D, Vlassis G, & Kalogeropoulos A (1990) Coexistence of spermatozoa morphological abnormalities in the semen of subfertile men with varicocele. (Translated from eng) *Eur J Obstet Gynecol Reprod Biol* 37(2):175-181 (in eng).
5. Mahony MC, *et al.* (1993) Functional and morphological features of spermatozoa microaspirated from the epididymal regions of cynomolgus monkeys (*Macaca fascicularis*). (Translated from eng) *Biol Reprod* 48(3):613-620 (in eng).
6. Ramakrishnan PR, Kaur J, & Rajalakshmi M (1990) Effect of non-aromatizable androgens on testicular and accessory gland functions in rhesus monkeys (*Macaca mulatta*). (Translated from eng) *J Reprod Fertil* 89(1):69-76 (in eng).
7. Moore HD, Hartman TD, & Holt WV (1984) The structure and epididymal maturation of the spermatozoon of the common marmoset (*Callithrix jacchus*). (Translated from eng) *J Anat* 138 ( Pt 2):227-235 (in eng).
8. Huszar G, *et al.* (1998) Cytoplasmic extrusion and the switch from creatine kinase B to M isoform are completed by the commencement of epididymal transport in human and stallion spermatozoa. (Translated from eng) *J Androl* 19(1):11-20 (in eng).
9. Gloria A, Contri A, De Amicis I, Robbe D, & Carluccio A (2011) Differences between epididymal and ejaculated sperm characteristics in donkey. (Translated from eng) *Anim Reprod Sci* 128(1-4):117-122 (in eng).
10. Lovercamp KW, *et al.* (2007) High resolution light microscopic evaluation of boar semen quality sperm cytoplasmic droplet retention in relationship with boar fertility parameters. (Translated from eng) *Arch Androl* 53(4):219-228 (in eng).
11. Kuster CE, Hess RA, & Althouse GC (2004) Immunofluorescence reveals ubiquitination of retained distal cytoplasmic droplets on ejaculated porcine spermatozoa. (Translated from eng) *J Androl* 25(3):340-347 (in eng).
12. Holt WV (1982) Epididymal origin of a coiled-tail sperm defect in a boar. (Translated from eng) *J Reprod Fertil* 64(2):485-489 (in eng).
13. Kaplan M, Russell LD, Peterson RN, & Martan J (1984) Boar sperm cytoplasmic droplets: their ultrastructure, their numbers in the epididymis and at ejaculation and their removal during isolation of sperm plasma membranes. (Translated from eng) *Tissue Cell* 16(3):455-468 (in eng).
14. Larsen RE, Shope RE, Jr., Leman AD, & Kurtz HJ (1980) Semen changes in boars after experimental infection with pseudorabies virus. (Translated from eng) *Am J Vet Res* 41(5):733-739 (in eng).



15. Reyes R, Vazquez ML, & Delgado NM (2004) Detection and bioimaging of nitric oxide in bovine oocytes and sperm cells. (Translated from eng) *Arch Androl* 50(4):303-309 (in eng).
16. Garbers DL, Wakabayashi T, & Reed PW (1970) Enzyme profile of the cytoplasmic droplet from bovine epididymal spermatozoa. (Translated from eng) *Biol Reprod* 3(3):327-337 (in eng).
17. Jindal SK & Panda JN (1980) Maturation changes of goat spermatozoa during transit through the epididymis. (Translated from eng) *Andrologia* 12(4):328-331 (in eng).
18. Schlegel RA, *et al.* (1986) Changes in the organization of the lipid bilayer of the plasma membrane during spermatogenesis and epididymal maturation. (Translated from eng) *Biol Reprod* 34(2):379-391 (in eng).
19. Moniem KA & Glover TD (1972) Alkaline phosphatase in the cytoplasmic droplet of mammalian spermatozoa. (Translated from eng) *J Reprod Fertil* 29(1):65-69 (in eng).
20. Delhon G & von Lawzewitsch I (1994) Ductus epididymidis compartments and morphology of epididymal spermatozoa in llamas. (Translated from eng) *Anat Histol Embryol* 23(3):217-225 (in eng).
21. Wildt DE, *et al.* (1988) A comparative analysis of ejaculate and hormonal characteristics of the captive male cheetah, tiger, leopard, and puma. (Translated from eng) *Biol Reprod* 38(2):245-255 (in eng).
22. Axner E, Linde-Forsberg C, & Einarsson S (1999) Morphology and motility of spermatozoa from different regions of the epididymal duct in the domestic cat. (Translated from eng) *Theriogenology* 52(5):767-778 (in eng).
23. Goodrowe KL, *et al.* (1998) Characteristics of fresh and frozen-thawed red wolf (*Canis rufus*) spermatozoa. (Translated from eng) *Anim Reprod Sci* 53(1-4):299-308 (in eng).
24. Pena AI, Barrio M, Becerra JJ, Quintela LA, & Herradon PG (2007) Infertility in a dog due to proximal cytoplasmic droplets in the ejaculate: investigation of the significance for sperm functionality in vitro. (Translated from eng) *Reprod Domest Anim* 42(5):471-478 (in eng).
25. Veeramachaneni DN, Smith MO, & Ellinwood NM (1998) Deficiency of fucosidase results in acrosomal dysgenesis and impaired sperm maturation. (Translated from eng) *J Androl* 19(4):444-449 (in eng).
26. Vanderhaeghen P, Schurmans S, Vassart G, & Parmentier M (1993) Olfactory receptors are displayed on dog mature sperm cells. (Translated from eng) *J Cell Biol* 123(6 Pt 1):1441-1452 (in eng).
27. Bains HK, Pabst MA, & Bawa SR (1993) Changes in the lectin binding sites on the testicular, epididymal, vas, and ejaculated spermatozoon surface of dog. (Translated from eng) *Andrologia* 25(1):19-24 (in eng).
28. Hrudka F (1983) Acrosomo-nuclear syndrome in canine sperm. (Translated from eng) *Andrologia* 15(4):310-321 (in eng).
29. Howard JG, Bush M, de Vos V, & Wildt DE (1984) Electroejaculation, semen characteristics and serum testosterone concentrations of free-ranging african elephants (*Loxodonta africana*). (Translated from eng) *J Reprod Fertil* 72(1):187-195 (in eng).

30. Jones RC (1980) Luminal composition and maturation of spermatozoa in the genital ducts of the African elephant (*Loxodonta africana*). (Translated from eng) *J Reprod Fertil* 60(1):87-93 (in eng).
31. Perez-Sanchez F, Tablado L, & Soler C (1997) Sperm morphological abnormalities appearing in the male rabbit reproductive tract. (Translated from eng) *Theriogenology* 47(4):893-901 (in eng).
32. Bavdek S & Glover TD (1970) Alkaline phosphatase in the cytoplasmic droplet of rabbit spermatozoa. (Translated from eng) *J Reprod Fertil* 22(2):371-373 (in eng).
33. Suzuki-Toyota F, Ito C, Maekawa M, Toyama Y, & Toshimori K (2010) Adhesion between plasma membrane and mitochondria with linking filaments in relation to migration of cytoplasmic droplet during epididymal maturation in guinea pig spermatozoa. (Translated from eng) *Cell Tissue Res* 341(3):429-440 (in eng).
34. Shi QX & Friend DS (1985) Effect of gossypol acetate on guinea pig epididymal spermatozoa in vivo and their susceptibility to capacitation in vitro. (Translated from eng) *J Androl* 6(1):45-52 (in eng).
35. Mollenhauer HH & Morre DJ (1981) Selective staining of dictyosome-like structures (DLS) from spermatocytes of the guinea pig using phosphotungstic acid at low pH. (Translated from eng) *Eur J Cell Biol* 25(2):340-345 (in eng).
36. Gottlieb W & Meizel S (1987) Biochemical studies of metalloendoprotease activity in the spermatozoa of three mammalian species. (Translated from eng) *J Androl* 8(1):14-24 (in eng).
37. Cummins JM (1976) Effects of epididymal occlusion on sperm maturation in the hamster. (Translated from eng) *J Exp Zool* 197(2):183-190 (in eng).
38. Oko R, Hermo L, Chan PT, Fazel A, & Bergeron JJ (1993) The cytoplasmic droplet of rat epididymal spermatozoa contains saccular elements with Golgi characteristics. (Translated from eng) *J Cell Biol* 123(4):809-821 (in eng).
39. Hermo L, Dworkin J, & Oko R (1988) Role of epithelial clear cells of the rat epididymis in the disposal of the contents of cytoplasmic droplets detached from spermatozoa. (Translated from eng) *Am J Anat* 183(2):107-124 (in eng).
40. Roberts ML, Scouten WH, & Nyquist SE (1976) Isolation and characterization of the cytoplasmic droplet in the rat. (Translated from eng) *Biol Reprod* 14(4):421-424 (in eng).
41. Cervantes MI, *et al.* (2008) Spermatozoa epididymal maturation in the Mexican big-eared bat (*Corynorhinus mexicanus*). (Translated from eng) *Syst Biol Reprod Med* 54(4-5):196-204 (in eng).
42. Jones RC, Hinds LA, & Tyndale-Biscoe CH (1984) Ultrastructure of the epididymis of the tammar, *Macropus eugenii*, and its relationship to sperm maturation. (Translated from eng) *Cell Tissue Res* 237(3):525-535 (in eng).
43. Temple-Smith PD (1984) Phagocytosis of sperm cytoplasmic droplets by a specialized region in the epididymis of the brushtailed possum, *Trichosurus vulpecula*. (Translated from eng) *Biol Reprod* 30(3):707-720 (in eng).
44. Temple-Smith PD & Bedford JM (1976) The features of sperm maturation in the epididymis of a marsupial, the brushtailed possum *Trichosurus vulpecula*. (Translated from eng) *Am J Anat* 147(4):471-499 (in eng).

45. Taggart DA, Leigh CM, & Breed WG (1995) Ultrastructure and motility of spermatozoa in the male reproductive tract of perameloid marsupials. (Translated from eng) *Reprod Fertil Dev* 7(5):1141-1156 (in eng).
46. Djakiew D & Jones RC (1983) Sperm maturation, fluid transport, and secretion and absorption of protein in the epididymis of the echidna, *Tachyglossus aculeatus*. (Translated from eng) *J Reprod Fertil* 68(2):445-456 (in eng).
47. Lin M & Jones RC (2000) Spermiogenesis and spermiation in a monotreme mammal, the platypus, *Ornithorhynchus anatinus*. (Translated from eng) *J Anat* 196 ( Pt 2):217-232 (in eng).
48. Aire TA & Soley JT (2000) The surface features of the epithelial lining of the ducts of the epididymis of the ostrich (*Struthio camelus*). (Translated from eng) *Anat Histol Embryol* 29(2):119-126 (in eng).
49. Morisawa S (2005) Spermiogenesis in the Hagfish *Eptatretus burgeri* (Agnatha). (Translated from eng) *Biol Bull* 209(3):204-214 (in eng).

Supporting Videos:

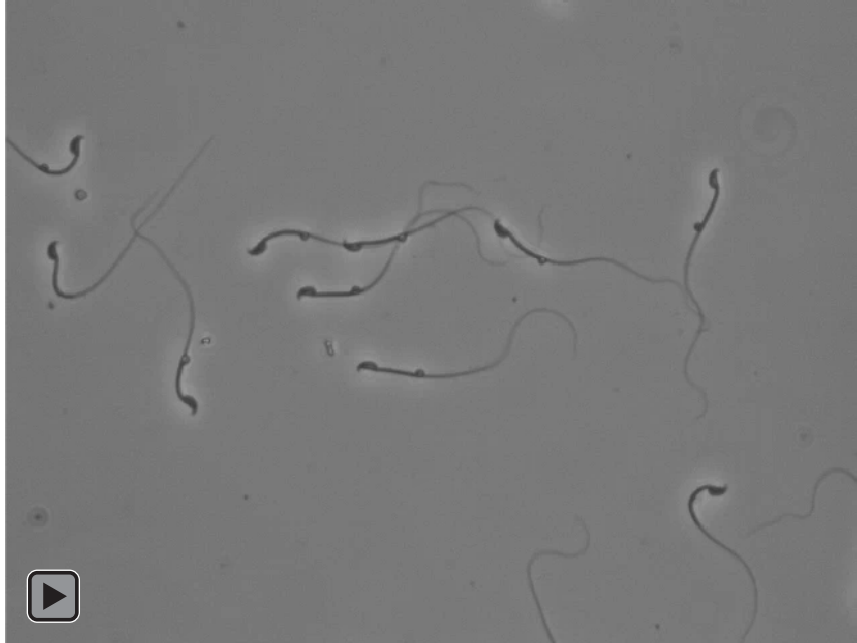

**Supporting Video S1.** CD-bearing murine epididymal spermatozoa displayed vigorous motility after activation in HTF-HEPES medium at 37°C for 30 minutes.

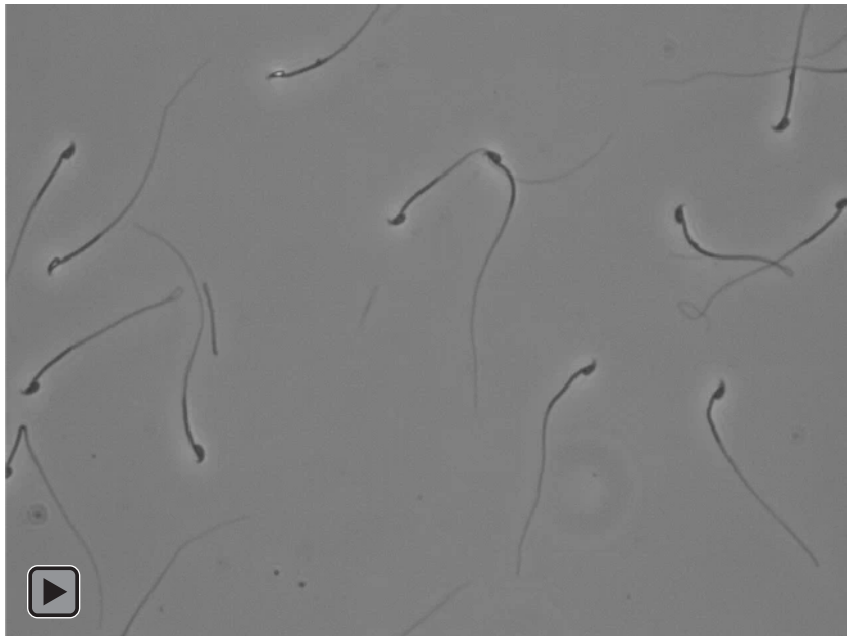

**Supporting Video S2.** “CD-less” murine epididymal spermatozoa developed no motility after activation in HTF-HEPES medium at 37°C for 30 minutes.
